# Supplementary material
Source: PubMed Central journal article supplement (PMC8813060)
Supplement: mmc1.pdf [file mmc1.pdf]

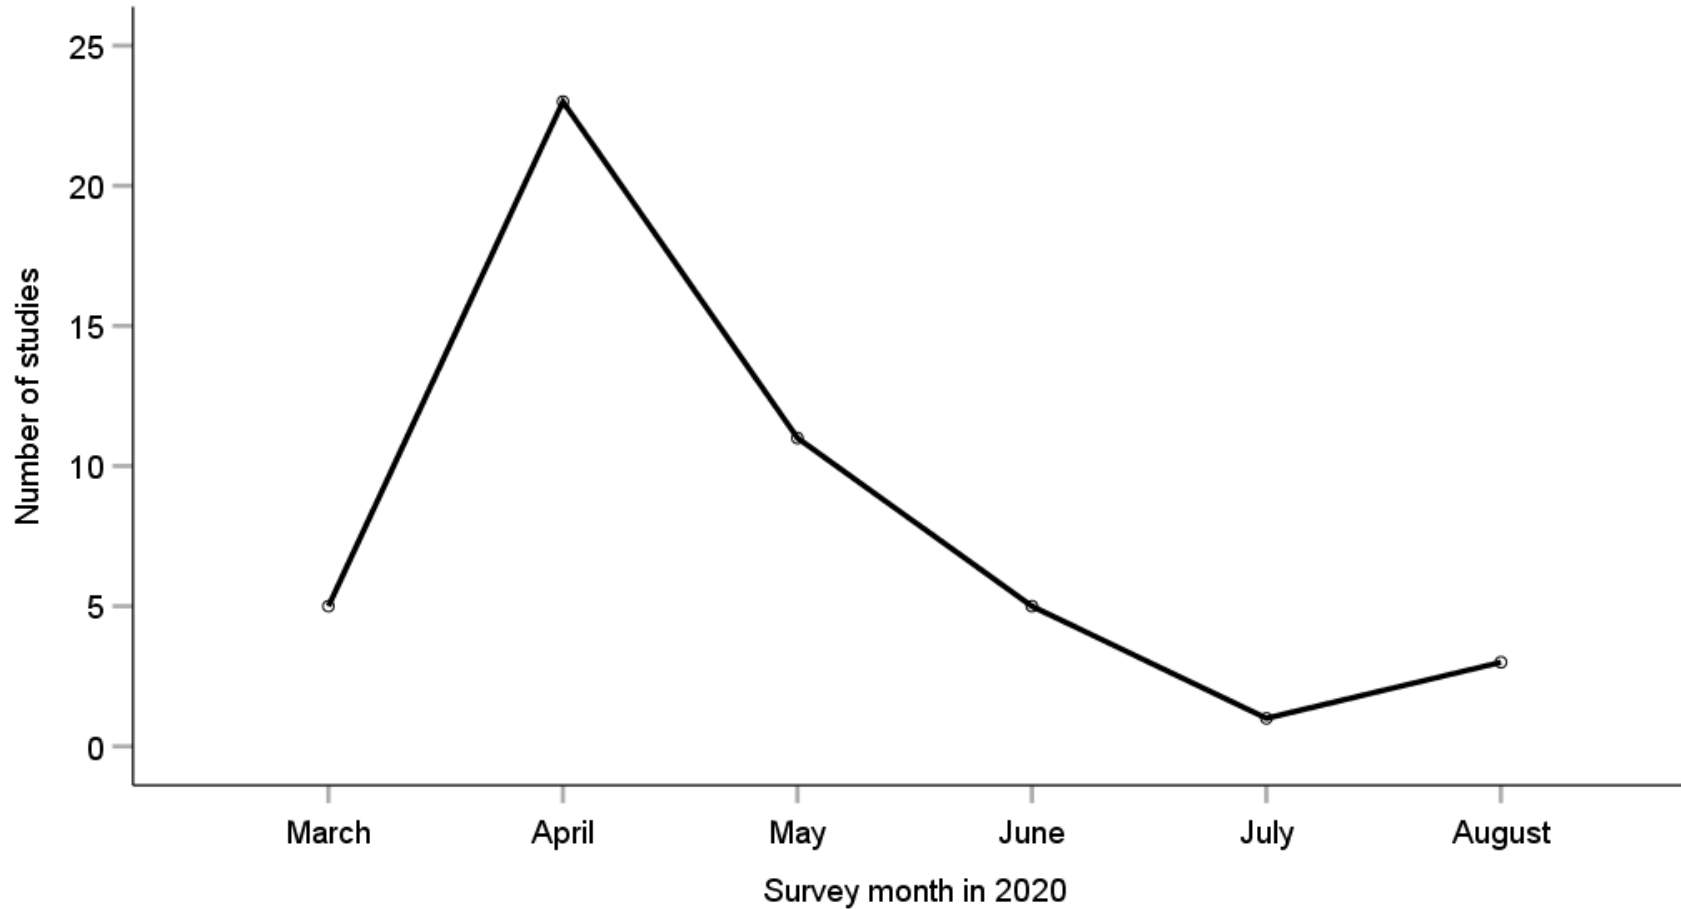

**Figure: Month of 2020 when mental health studies included in the analysis of the COVID-19 Mental Disorders Collaborators were conducted (n=48 studies).**

Dates were extracted by the correspondence authors. The mid-point of data collection was used to identify the month of each study.
